# Supplementary material for: Self-healing polyacrylamide (PAAm) gels at room temperature based on complementary guanine and cytosine base pairs
Source: Royal Society of Chemistry journal article supplement (doi:10.1039/d2sm00933a), 2022-01-01
Supplement: d2sm00933a1.pdf [file d2sm00933a1.pdf]

## Supporting Information

### Self-healing Polyacrylamide (PAAm) Gels at Room Temperature Based on Complementary Guanine and Cytosine Base Pairs

Yingying Wei<sup>1</sup>, Ling Chen<sup>1</sup>, Yong Jiang<sup>1\*</sup>

<sup>1</sup>School of Chemistry and Chemical Engineering, Southeast University, Jiangsu Province Hi-Tech Key Laboratory for Biomedical Research Jiangnan, Nanjing, Jiangsu 211189, P. R. China.

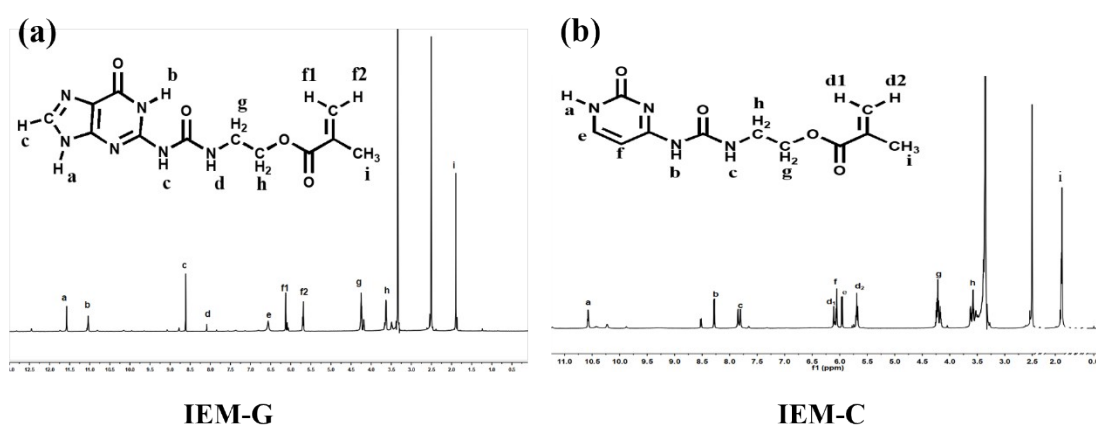

**Fig. S1.** The <sup>1</sup>H NMR spectrum of a) IEM-G and b) IEM-C in DMSO-d<sub>6</sub>.

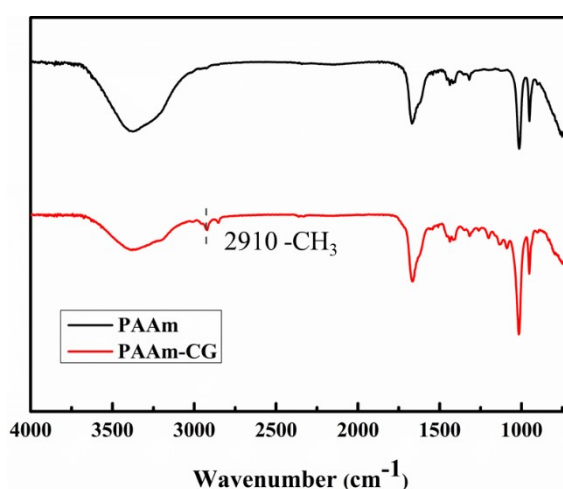

**Fig. S2.** Fourier transform infrared spectroscopy (FT-IR) spectra of PAAm and PAAm-CG gel.

**Table S1.** Different DMSO ratio in preparing PAM-based materials

| AAM (g) | NAPP (wt%) | TMEDA (wt%) | APS (wt%) | $\frac{m(IEM - C/G)}{m(AAm)}$ | DMSO (mL) |
|---------|------------|-------------|-----------|-------------------------------|-----------|
| 1.5     | 1          | 1           | 1         | 1/30                          | 1.5       |
| 1.5     | 1          | 1           | 1         | 1/30                          | 2.0       |
| 1.5     | 1          | 1           | 1         | 1/30                          | 2.5       |
| 1.5     | 1          | 1           | 1         | 1/30                          | 3.0       |

1.5 mL DMSO is not enough to dissolve all solid components, so the stress and strain of the gel cannot be accurately measured. It can be seen from Fig. S2 that when the amount of solvent DMSO is 2 mL, the gel obtained has better mechanical properties.

**Table S2.** Mechanical properties with different IEM-CG addition ratio in preparing PAM-based materials

| $\frac{m(IEM - C/G)}{m(AAm)}$        | 1:10      | 1:20       | 1:30       | 1:40      | 0         |
|--------------------------------------|-----------|------------|------------|-----------|-----------|
| elastic modulus (KPa)                | 31.73±2.1 | 35.39±1.7  | 28.42±2.4  | 18.31±3.2 | 10.08±2.7 |
| failure tensile stress (KPa)         | 59.84±2.6 | 93.91±1.4  | 97.61±2.9  | 58.16±3.5 | 38.86±3.3 |
| failure tensile strain (%)           | 189       | 271        | 365        | 317       | 375       |
| fracture energy (KJ/m <sup>3</sup> ) | 56.64±1.8 | 130.04±2.3 | 176.58±2.9 | 92.38±3.6 | 74.88±2.7 |

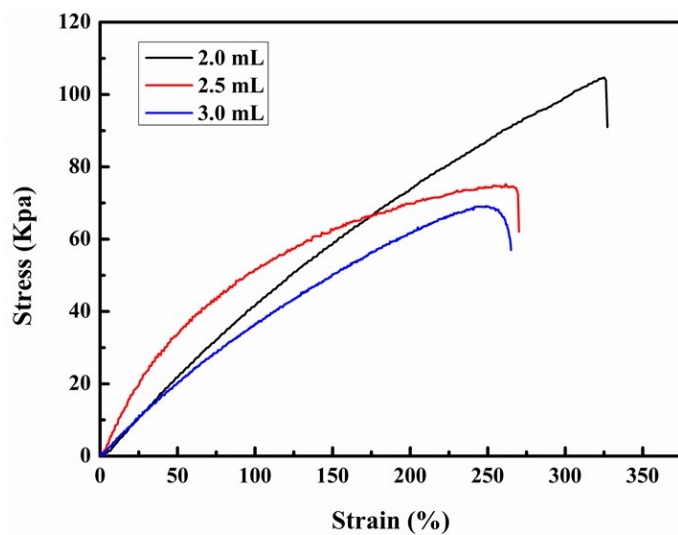

**Fig. S3.** Stress-strain curves of materials prepared with different volumes of DMSO.

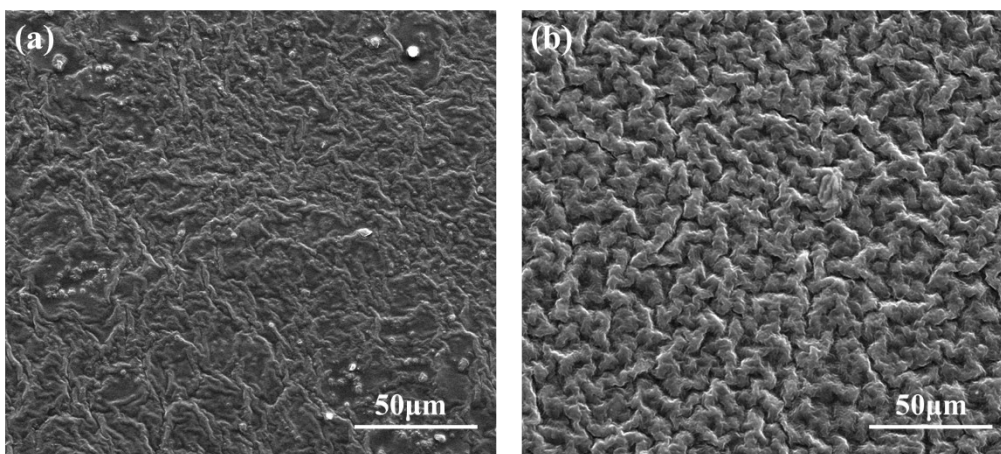

**Fig. S4.** SEM image of pure PAAm (a) and PAAm-CG (b) gel.

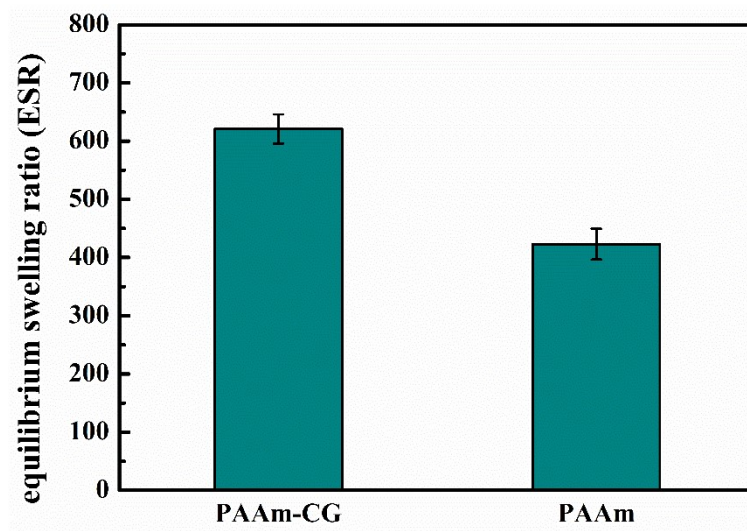

**Fig. S5.** The equilibrium swelling ratio of PAAm-CG and PAAm gel.

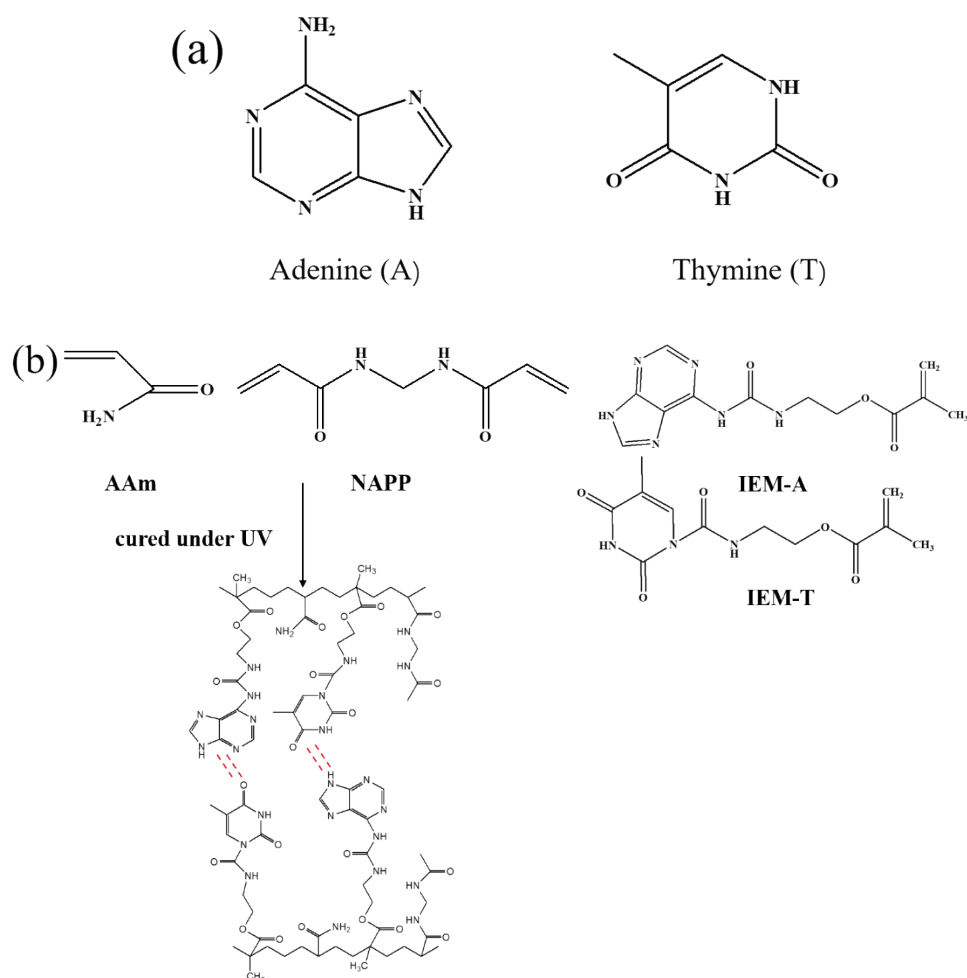

**Fig. S6.** Chemical structure of the adenine (A) and thymine (T) (a) and structure of PAAm-AT gel (b).

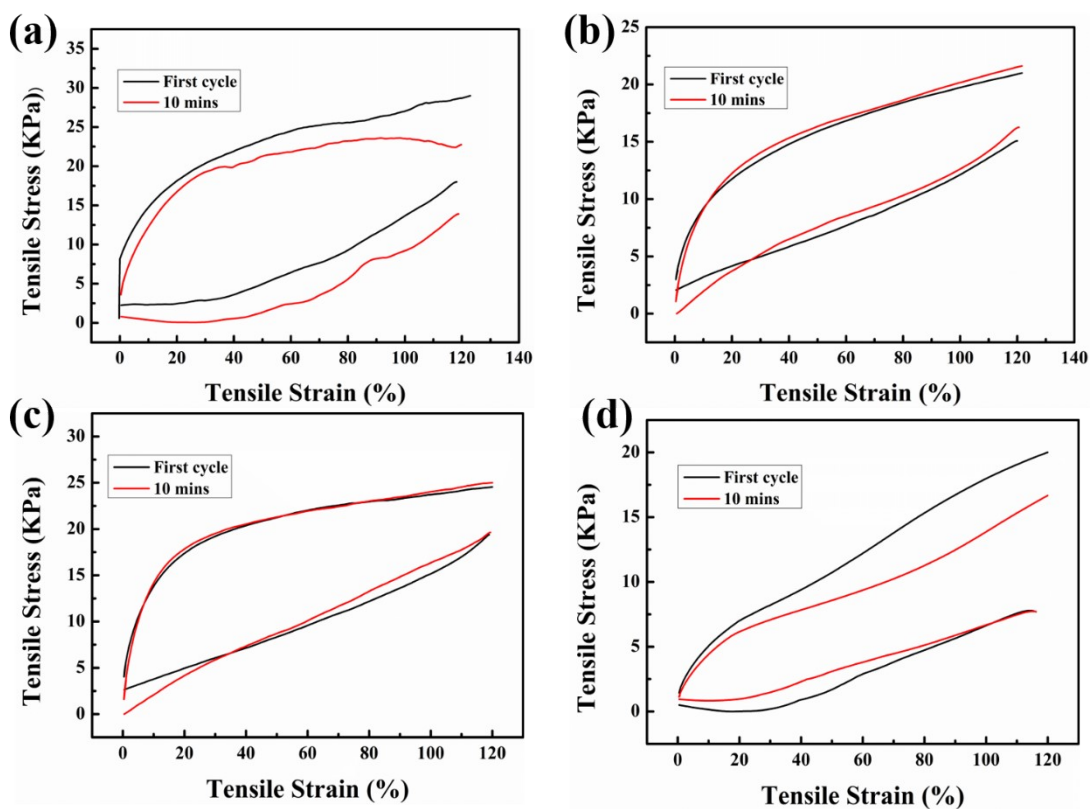

**Fig. S7.** Loading-unloading curves of self-healing PAAm-CG gels with different healing times at room temperature (a) 5 h, (b) 20 h, (c) 25 h. Loading-unloading curves of self-healing PAAm-CG gels at 50°C self-healing 6 h (d).

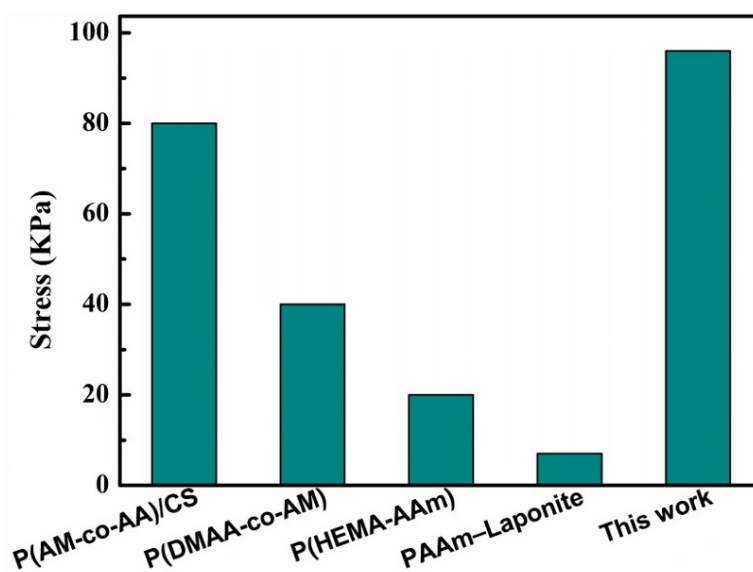

**Fig. S8.** Comparison of stress in different work.

**Table S3.** Comparison of self-healing efficiency of self-healing PAAm prepared in different work.

| Works          | Self-healing efficiency |
|----------------|-------------------------|
| P(AM-co-AA)/CS | 67%                     |
| P(DMAA-co-AM)  | 80%                     |
| P(HEMA-AAm)    | 65%                     |
| PAAm–Laponite  | 85%                     |
| This work      | 90%                     |
